# Supplementary material for: Unpacking excessive polypharmacy patterns among individuals living with chronic pain in Quebec: a longitudinal study
Source: Frontiers journal article supplement (doi:10.3389/fpain.2025.1512878), 2025-02-21
Supplement: Data_Sheet_1.pdf [file Data_Sheet_1.pdf]

## Supplementary material 1 - Model fit indices tables

Table legend:

<sup>1</sup> Trajectory shape: 1 = linear (straight line); 2 = linear + quadratic (u-shaped curve/parabola).

<sup>2</sup> BIC: Bayesian information criterion.

**Bold text:** Model which best fits the data and respected all criteria (lowest BIC absolute value among trajectory groups that respected the 5% criteria).

\* One or more groups in the model had less than 5% of participants.

\*\* Lowest BIC but not the most clinically interpretable model.

### Model fit indices for trajectories of polypharmacy in the whole study sample

| Number of trajectories | Trajectory shape <sup>1</sup> | BIC <sup>2</sup> (n=9156) |
|------------------------|-------------------------------|---------------------------|
| 1                      | 1                             | -50448.47                 |
| 1                      | 2                             | -50452.72                 |
| 2                      | 11                            | -22750.35                 |
| 2                      | 21                            | -22749.67                 |
| 2                      | 12                            | -22747.68                 |
| 2                      | 22                            | -22746.34                 |
| 3                      | 111                           | -20341.26                 |
| 3                      | 121                           | -20343.83                 |
| 3                      | 211                           | -20343.83                 |
| 3                      | 221                           | -20348.39                 |
| 3                      | 112                           | -20333.14                 |
| 3                      | 122                           | -20335.71                 |
| 3                      | 212                           | -20957.95                 |
| 3                      | 222                           | -20340.23                 |
| 4                      | 1121                          | -20070.33                 |
| <b>4</b>               | <b>1122</b>                   | <b>-20063.09</b>          |
| 4                      | 1211                          | -20135.79                 |

|   |        |           |
|---|--------|-----------|
| 4 | 1221   | -20073.53 |
| 4 | 2121   | -20145.63 |
| 4 | 2211   | -20148.99 |
| 4 | 2221   | -20661.45 |
| 4 | 1112   | -20117.93 |
| 4 | 1212   | -20121.95 |
| 4 | 1222   | -20065.78 |
| 4 | 2112   | -20072.50 |
| 4 | 2122   | -20147.40 |
| 4 | 2212   | -20127.97 |
| 4 | 2222   | -20067.52 |
| 5 | 11111* | -19982.86 |
| 5 | 11121* | -19985.49 |
| 5 | 11211  | -20064.54 |
| 5 | 11221  | -20065.74 |
| 5 | 12111* | -19985.56 |
| 5 | 12121* | -19988.19 |
| 5 | 12211* | -19988.19 |

#### Model fit indices for trajectories of polypharmacy in males

| Number of trajectories | Trajectory shape <sup>1</sup> | BIC <sup>2</sup> (n=3248) |
|------------------------|-------------------------------|---------------------------|
| 1                      | 1                             | -16079.73                 |
| 1                      | 2                             | -16083.44                 |
| 2                      | 11                            | -6874.96                  |
| 2                      | 12                            | -6875.68                  |
| 2                      | 21                            | -6878.00                  |
| 2                      | 22                            | -6878.53                  |
| 3                      | 111                           | -6175.39                  |
| 3                      | 112                           | -6175.61                  |

|          |             |                     |
|----------|-------------|---------------------|
| 3        | 121         | -6179.33            |
| 3        | 211         | -6274.60            |
| 3        | 122         | -6179.54            |
| 3        | 212         | -6179.54            |
| 3        | 221         | -6283.31            |
| 3        | 222         | -6183.58            |
| 4        | 1111*       | -6119.45            |
| <b>4</b> | <b>1112</b> | <b>-6121.17</b>     |
| 4        | 1121*       | -6091.56            |
| 4        | 1122*       | -6120.62            |
| 4        | 1211*       | -6123.49            |
| 4        | 2111*       | -6123.49            |
| 4        | 1212*       | -6103.97            |
| 4        | 1221*       | -6126.14            |
| 4        | 2121*       | -6092.59            |
| 4        | 2112*       | -6126.46            |
| 4        | 2211        | -6192.15            |
| 4        | 1222*       | -6110.94            |
| 4        | 2122        | Convergence trouble |
| 4        | 2212*       | -6129.12            |
| 4        | 2221*       | -6096.10            |
| 4        | 2222*       | -6126.46            |

#### Model fit indices for trajectories of polypharmacy in females

| Number of trajectories | Trajectory shape <sup>1</sup> | BIC <sup>2</sup> (n=5908) |
|------------------------|-------------------------------|---------------------------|
| 1                      | 1                             | -34207.17                 |
| 1                      | 2                             | -34211.43                 |
| 2                      | 11                            | -15849.95                 |
| 2                      | 12                            | -15850.50                 |

|          |             |                     |
|----------|-------------|---------------------|
| 2        | 21          | -15850.71           |
| 2        | 22          | -15850.84           |
| 3        | 111         | -14160.58           |
| 3        | 112         | -14155.98           |
| 3        | 121         | -14194.57           |
| 3        | 211         | -14161.89           |
| 3        | 122         | -14157.28           |
| 3        | 212         | -14157.28           |
| 3        | 221         | -14166.23           |
| 3        | 222         | -14161.57           |
| 4        | 1111        | -13972.80           |
| 4        | 1112*       | -14003.22           |
| 4        | 1121        | -13971.45           |
| 4        | 1122        | -13974.77           |
| <b>4</b> | <b>1211</b> | <b>-13921.97</b>    |
| 4        | 1212        | -14001.87           |
| 4        | 1221        | -13983.63           |
| 4        | 1222        | -13994.96           |
| 4        | 2222*       | Convergence trouble |
| 4        | 2221        | -14036.08           |
| 4        | 2212*       | -13980.23           |
| 4        | 2111*       | -14036.46           |
| 4        | 2112        | -13976.20           |
| 4        | 2121*       | -14037.40           |
| 4        | 2122        | -14026.20           |
| 4        | 2211        | -13978.12           |
| 5        | 22222       | Convergence trouble |
| 5        | 11111**     | -13967.67           |
| 5        | 12111**     | -13972.03           |

## Supplementary material 2 – Profile of participants in each trajectory.

Statistically significant differences were found between groups for the following variables:

***Sociodemographic variables:*** Age, sex at birth, white self-identified race, country of birth, education level, relationship status, annual household income, number of people in the household, living in a remote region, living in a rural area).

***Pain related variables:*** Pain intensity, activities prevented by pain, self-reported back pain, self-reported arthritis, opioids use 30 days after survey completion, benzodiazepines use 30 days after survey completion.

***General health and lifestyle profile variables:*** Combined comorbidity index of Charlson and Elixhauser, perceived mental health, perceived general health, alcohol consumption in the past 12 months, physical activity, lifestyle.

***Healthcare variables:*** Visiting a pain clinic in the year before survey completion, reporting having a regular physician, and the past-year number of hospitalizations, visits to a family physician, visits to a specialist, emergency room visits, prescribers consulted, and different physicians consulted.

| Characteristics (n = 9156)                                                      | No excessive polypharmacy<br>(trajectory2)<br>n = 6943 | Sometimes in excessive polypharmacy<br>(trajectory1)<br>n=697 | Often in excessive polypharmacy<br>(trajectory3)<br>n=536 | Always in excessive polypharmacy<br>(trajectory4)<br>n=980 |
|---------------------------------------------------------------------------------|--------------------------------------------------------|---------------------------------------------------------------|-----------------------------------------------------------|------------------------------------------------------------|
| <b>Sociodemographic profile</b>                                                 | <b>75.83%</b>                                          | <b>7.61%</b>                                                  | <b>5.85%</b>                                              | <b>10.70%</b>                                              |
| <b>Age (years)** †</b>                                                          |                                                        |                                                               |                                                           |                                                            |
| 18-64                                                                           | 3526 (50.78%)                                          | 236 (33.86%)                                                  | 134 (25.00%)                                              | 299 (30.51%)                                               |
| 65-79                                                                           | 2683 (38.64%)                                          | 326 (46.77%)                                                  | 267 (49.81%)                                              | 460 (46.94%)                                               |
| ≥ 80                                                                            | 734 (10.57%)                                           | 135 (19.37%)                                                  | 135 (25.19%)                                              | 221 (22.55%)                                               |
| <b>Sex at birth**</b>                                                           |                                                        |                                                               |                                                           |                                                            |
| Females                                                                         | 4349 (62.64%)                                          | 498 (71.45%)                                                  | 379 (70.71%)                                              | 682 (69.59%)                                               |
| Males                                                                           | 2594 (37.36%)                                          | 199 (28.55%)                                                  | 157 (29.29%)                                              | 298 (30.41%)                                               |
| <b>White self-identified race**</b>                                             |                                                        |                                                               |                                                           |                                                            |
| Yes                                                                             | 6447 (92.86%)                                          | 662 (94.98%)                                                  | 510 (95.15%)                                              | 944 (96.33%)                                               |
| No                                                                              | 496 (7.14%)                                            | 35 (5.02%)                                                    | 26 (4.85%)                                                | 36 (3.67%)                                                 |
| <b>Country of birth**</b>                                                       |                                                        |                                                               |                                                           |                                                            |
| Canada                                                                          | 6409 (92.34%)                                          | 652 (93.68%)                                                  | 499 (93.10%)                                              | 943 (96.22%)                                               |
| Other                                                                           | 532 (7.66%)                                            | 44 (6.32%)                                                    | 37 (6.90%)                                                | 37 (3.78%)                                                 |
| <b>Education level**</b>                                                        |                                                        |                                                               |                                                           |                                                            |
| No secondary diploma                                                            | 2585 (37.70%)                                          | 345 (50.15%)                                                  | 276 (52.57%)                                              | 545 (56.65%)                                               |
| Secondary diploma                                                               | 917 (13.38%)                                           | 78 (11.34%)                                                   | 70 (13.33%)                                               | 106 (11.02%)                                               |
| College diploma/ Registered apprenticeship/ other trades certificate or diploma | 2496 (36.41%)                                          | 196 (28.49%)                                                  | 129 (24.57%)                                              | 256 (26.61%)                                               |
| University diploma                                                              | 858 (12.51%)                                           | 69 (10.03%)                                                   | 50 (9.52%)                                                | 55 (5.72%)                                                 |
| <b>Relationship status **</b>                                                   |                                                        |                                                               |                                                           |                                                            |
| In a relationship                                                               | 3051 (43.98%)                                          | 257 (36.87%)                                                  | 200 (37.31%)                                              | 339 (34.59%)                                               |
| Not in a relationship                                                           | 3887 (56.02%)                                          | 440 (63.13%)                                                  | 336 (62.69%)                                              | 641 (65.41%)                                               |
| <b>Annual household income (Can\$)** †</b>                                      |                                                        |                                                               |                                                           |                                                            |
| < 20,000                                                                        | 2097 (30.20%)                                          | 267 (38.31%)                                                  | 228 (42.54%)                                              | 491 (50.10%)                                               |
| 20,000 -39,999                                                                  | 2657 (38.27%)                                          | 273 (39.17%)                                                  | 208 (38.81%)                                              | 344 (35.10%)                                               |
| 40,000 – 59,999                                                                 | 1220 (17.57%)                                          | 96 (13.77%)                                                   | 66 (12.31%)                                               | 86 (8.78%)                                                 |

|                                                                            |               |              |              |              |
|----------------------------------------------------------------------------|---------------|--------------|--------------|--------------|
| ≥ 60,000                                                                   | 969 (13.96%)  | 61 (8.75%)   | 34 (6.34%)   | 59 (6.02%)   |
| <b>Number of people in the household**</b> – mean ± SD                     | 1.75 ± 0.96   | 1.53 ± 0.74  | 1.55 ± 0.83  | 1.59 ± 2.45  |
| <b>Living in a remote region**</b>                                         |               |              |              |              |
| Yes                                                                        | 1818 (26.18%) | 190 (27.26%) | 149 (27.80%) | 291 (29.69%) |
| No                                                                         | 5125 (73.82%) | 507 (72.74%) | 387 (72.20%) | 689 (70.31%) |
| <b>Living in a rural area**</b>                                            |               |              |              |              |
| Yes                                                                        | 2254 (32.46%) | 207 (29.70%) | 143 (26.68%) | 294 (30.00%) |
| No                                                                         | 4689 (67.54%) | 490 (70.30%) | 393 (73.32%) | 686 (70.00%) |
| <b>Pain symptoms</b>                                                       |               |              |              |              |
| <b>Pain intensity**</b>                                                    |               |              |              |              |
| Mild                                                                       | 1581 (22.98%) | 86 (12.43%)  | 69 (13.09%)  | 100 (10.36%) |
| Moderate or severe                                                         | 5298 (77.02%) | 606 (87.57%) | 458 (86.91%) | 865 (89.64%) |
| <b>Activities prevented by pain or discomfort**</b>                        |               |              |              |              |
| None or a few                                                              | 5000 (72.37%) | 403 (58.15%) | 267 (50.38%) | 449 (46.05%) |
| Some or most                                                               | 1909 (27.63%) | 290 (41.85%) | 263 (49.62%) | 526 (53.95%) |
| <b>Self-reported back pain (except fibromyalgia and arthritis)**</b>       |               |              |              |              |
| Yes                                                                        | 2870 (41.47%) | 315 (45.59%) | 223 (41.76%) | 501 (51.23%) |
| <b>Self-reported arthritis (except fibromyalgia)**</b>                     |               |              |              |              |
| Yes                                                                        | 3021 (43.76%) | 424 (61.18%) | 352 (65.92%) | 638 (65.44%) |
| <b>Opioids use 30 days after survey completion**</b>                       |               |              |              |              |
| Yes                                                                        | 313 (4.51%)   | 84 (12.05%)  | 70 (13.06%)  | 223 (22.76%) |
| <b>Benzodiazepines use 30 days after survey completion**</b>               |               |              |              |              |
| Yes                                                                        | 1391 (20.03%) | 328 (47.06%) | 248 (46.27%) | 594 (60.61%) |
| <b>General health and lifestyle profile</b>                                |               |              |              |              |
| <b>Combined comorbidity index of Charlson and Elixhauser**</b> – mean ± SD | 0.39 ± 1.19   | 1.07 ± 2.20  | 1.24 ± 2.24  | 1.59 ± 2.45  |
| <b>Perceived general health**</b>                                          |               |              |              |              |

|                                                                       |               |              |              |              |
|-----------------------------------------------------------------------|---------------|--------------|--------------|--------------|
| Excellent, very good or good                                          | 4677 (67.48%) | 279 (40.14%) | 215 (40.11%) | 267 (27.27%) |
| Fair or bad                                                           | 2254 (32.52%) | 416 (59.86%) | 321 (59.89%) | 712 (72.73%) |
| <b>Perceived mental health**</b>                                      |               |              |              |              |
| Excellent, very good or good                                          | 6066 (90.32%) | 563 (84.79%) | 429 (85.80%) | 750 (82.78%) |
| Fair or bad                                                           | 650 (9.68%)   | 101 (15.21%) | 71 (14.20%)  | 156 (17.22%) |
| <b>Alcohol consumption in the past 12 months**</b>                    |               |              |              |              |
| Regular                                                               | 3949 (57.11%) | 263 (37.90%) | 214 (40.00%) | 275 (28.21%) |
| Occasional or has not drunk                                           | 2966 (42.89%) | 431 (62.10%) | 321 (60.00%) | 700 (71.79%) |
| <b>Smoking</b>                                                        |               |              |              |              |
| Regular                                                               | 1587 (22.86%) | 150 (21.52%) | 102 (19.03%) | 210 (21.43%) |
| Occasional or never                                                   | 5354 (77.14%) | 547 (78.48%) | 434 (80.97%) | 770 (78.57%) |
| <b>Physical activity **</b>                                           |               |              |              |              |
| Regular                                                               | 3767 (56.01%) | 282 (42.41%) | 166 (33.13%) | 279 (30.79%) |
| Occasional or rare                                                    | 2958 (43.99%) | 383 (57.59%) | 335 (66.87%) | 627 (69.21%) |
| <b>Lifestyle **</b>                                                   |               |              |              |              |
| Active or moderately active                                           | 2710 (40.30%) | 183 (27.52%) | 98 (19.56%)  | 174 (19.21%) |
| Inactive                                                              | 4015 (59.70%) | 482 (72.48%) | 403 (80.44%) | 732 (80.79%) |
| <b>Health care</b>                                                    |               |              |              |              |
| <b>Visiting a pain clinic in the year before survey completion**</b>  |               |              |              |              |
| Yes                                                                   | 103 (1.48%)   | 18 (2.58%)   | 16 (2.99%)   | 26 (2.65%)   |
| <b>Having a family physician**</b>                                    |               |              |              |              |
| Yes                                                                   | 5737 (82.63%) | 650 (93.26%) | 500 (93.28%) | 927 (94.59%) |
| <b>Past-year number of hospitalizations**</b>                         |               |              |              |              |
| – mean ± SD                                                           | 0.19 ± 0.59   | 0.39 ± 0.82  | 0.47 ± 2.24  | 0.56 ± 0.98  |
| <b>Past-year number of visits to a family physician** – mean ± SD</b> | 3.05 ± 3.15   | 4.75 ± 5.34  | 4.51 ± 3.73  | 5.03 ± 3.87  |
| <b>Past-year number of specialist visits** – mean ± SD</b>            | 3.15 ± 4.79   | 6.04 ± 8.65  | 6.67 ± 11.37 | 7.07 ± 12.40 |
| <b>Past-year number of emergency room visits** – mean ± SD</b>        | 0.57 ± 1.24   | 0.91 ± 1.59  | 1.14 ± 1.90  | 1.40 ± 2.20  |



|                                                                                        |                 |                 |                 |                 |
|----------------------------------------------------------------------------------------|-----------------|-----------------|-----------------|-----------------|
| <b>Past-year number of prescribers consulted** – mean <math>\pm</math> SD</b>          | 2.30 $\pm$ 1.77 | 3.74 $\pm$ 2.31 | 4.06 $\pm$ 2.59 | 4.57 $\pm$ 3.10 |
| <b>Past-year number of different physicians consulted** – mean <math>\pm</math> SD</b> | 4.45 $\pm$ 4.04 | 7.09 $\pm$ 5.82 | 7.98 $\pm$ 6.64 | 8.79 $\pm$ 7.47 |

*Table footnotes:*

\* Bivariate comparison p-value < 0.05 and \*\* p-value < 0.001 (Bonferroni correction: p-value<0.0016).

† Categories have been redesigned to comply with confidentiality rules.

The variable “Indigenous self-identification” had to be excluded because n<15.

### Supplementary material 3 – Determinants of Trajectory Membership.

(reference “no polypharmacy”, n=5766)

| Characteristics *<br>(n = 7644)                                                                                                                                                 | Sometimes in excessive<br>polypharmacy (#trajectory1)<br>n=595                                                           | Often in excessive<br>polypharmacy (#trajectory3)<br>n=450                                                               | Always in excessive<br>polypharmacy (#trajectory4)<br>n=833                                                              |
|---------------------------------------------------------------------------------------------------------------------------------------------------------------------------------|--------------------------------------------------------------------------------------------------------------------------|--------------------------------------------------------------------------------------------------------------------------|--------------------------------------------------------------------------------------------------------------------------|
| <b>Sociodemographic profile</b>                                                                                                                                                 |                                                                                                                          |                                                                                                                          |                                                                                                                          |
| <b>Age (years)</b>                                                                                                                                                              | OR 1.03 95% CI 1.02 to 1.04                                                                                              | OR 1.04 95% CI 1.03 to 1.06                                                                                              | OR 1.04 95% CI 1.03 to 1.05                                                                                              |
| <b>Sex at birth</b><br>Females (vs. Males)                                                                                                                                      | OR 1.5 95% CI 0.93 to 1.42                                                                                               | OR 1.09 95% CI 0.85 to 1.39                                                                                              | OR 0.96 95% CI 0.79 to 1.18                                                                                              |
| <b>White self-identified race</b><br>Yes (vs. No)                                                                                                                               | OR 1.27 95% CI 0.53 to 3.07                                                                                              | OR 0.91 95% CI 0.35 to 2.38                                                                                              | OR 1.61 95% CI 0.59 to 4.40                                                                                              |
| <b>Country of birth</b><br>Canada (vs. Other)                                                                                                                                   | OR 1.08 95% CI 0.63 to 1.84                                                                                              | OR 1.82 95% CI 0.94 to 3.54                                                                                              | OR 2.60 95% CI 1.37 to 4.96                                                                                              |
| <b>Education level</b> (vs. No secondary diploma)<br>Secondary diploma<br>College diploma/ Registered apprenticeship/ other trades certificate or diploma<br>University diploma | OR 0.88 95% CI 0.66 to 1.19<br>OR 0.92 95% CI 0.74 to 1.15<br>OR 1.00 95% CI 0.71 to 1.40                                | OR 1.08 95% CI 0.78 to 1.50<br>OR 1.01 95% CI 0.78 to 1.30<br>OR 1.16 95% CI 0.78 to 1.71                                | OR 0.90 95% CI 0.68 to 1.21<br>OR 1.05 95% CI 0.85 to 1.30<br>OR 0.76 95% CI 0.52 to 1.11                                |
| <b>Relationship status</b><br>In a relationship (vs. not in a relationship)                                                                                                     | OR 0.94 95% CI 0.73 to 1.21                                                                                              | OR 1.05 95% CI 0.79 to 1.39                                                                                              | OR 1.21 95% CI 0.95 to 1.56                                                                                              |
| <b>Annual household income (Can\$)</b> (vs. < 20,000)<br>20,000 – 39,999<br>40,000 – 59,999<br>60,000 – 79,999<br>≥ 80,000                                                      | OR 1.01 95% CI 0.81 to 1.27<br>OR 1.09 95% CI 0.79 to 1.50<br>OR 1.14 95% CI 0.70 to 1.84<br>OR 0.88 95% CI 0.49 to 1.59 | OR 0.66 95% CI 0.51 to 0.85<br>OR 0.57 95% CI 0.39 to 0.83<br>OR 0.65 95% CI 0.37 to 1.13<br>OR 0.37 95% CI 0.18 to 0.80 | OR 0.60 95% CI 0.48 to 0.75<br>OR 0.45 95% CI 0.32 to 0.64<br>OR 0.45 95% CI 0.26 to 0.77<br>OR 0.64 95% CI 0.36 to 1.15 |
| <b>Number of people in the household</b>                                                                                                                                        | OR 0.87 95% CI 0.74 to 1.04                                                                                              | OR 1.02 95% CI 0.87 to 1.21                                                                                              | OR 0.92 95% CI 0.78 to 1.16                                                                                              |
| <b>Living in a remote region</b><br>Yes (vs. No)                                                                                                                                | OR 1.06 95% CI 0.85 to 1.32                                                                                              | OR 1.24 95% CI 0.96 to 1.59                                                                                              | OR 1.10 95% CI 0.89 to 1.36                                                                                              |

|                                                                                               |                                                            |                                                            |                                                            |
|-----------------------------------------------------------------------------------------------|------------------------------------------------------------|------------------------------------------------------------|------------------------------------------------------------|
| <b>Living in an urban area</b><br>Yes (vs. No)                                                | OR 0.97 95% CI 0.79 to 1.20                                | OR 1.19 95% CI 0.93 to 1.52                                | OR 1.07 95% CI 0.87 to 1.31                                |
| <b>Pain symptoms</b>                                                                          |                                                            |                                                            |                                                            |
| <b>Pain intensity</b><br>Moderate or severe (vs. Mild)                                        | OR 1.55 95% CI 1.18 to 2.05                                | OR 1.25 95% CI 0.92 to 1.70                                | OR 1.48 95% CI 1.12 to 1.96                                |
| <b>Activities prevented by pain or discomfort</b><br>Some or most (vs. None or a few)         | OR 1.18 95% CI 0.97 to 1.45                                | OR 1.57 95% CI 1.25 to 1.97                                | OR 1.52 95% CI 1.26 to 1.83                                |
| <b>Self-reported back pain (except fibromyalgia and arthritis)</b><br>Yes                     | OR 1.08 95% CI 0.90 to 1.31                                | OR 0.93 95% CI 0.75 to 1.15                                | OR 1.25 95% CI 1.04 to 1.50                                |
| <b>Self-reported arthritis (except fibromyalgia)</b><br>Yes                                   | OR 1.30 95% CI 1.07 to 1.58                                | OR 1.39 95% CI 1.12 to 1.74                                | OR 1.41 95% CI 1.17 to 1.70                                |
| <b>Opioids use 30 days after survey completion</b><br>Yes                                     | OR 1.43 95% CI 1.05 to 1.94                                | OR 1.83 95% CI 1.32 to 2.53                                | OR 2.83 95% CI 2.20 to 3.63                                |
| <b>Benzodiazepines use 30 days after survey completion</b><br>Yes (vs. No)                    | OR 2.05 95% CI 1.70 to 2.47                                | OR 1.95 95% CI 1.58 to 2.47                                | OR 3.04 95% CI 2.55 to 3.64                                |
| <b>General health and lifestyle profile</b>                                                   |                                                            |                                                            |                                                            |
| <b>Combined comorbidity index of Charlson and Elixhauser</b>                                  | OR 1.09 95% CI 1.03 to 1.16                                | OR 1.10 95% CI 1.03 to 1.17                                | OR 1.12 95% CI 1.06 to 1.19                                |
| <b>Perceived general health</b><br>Fair or bad (vs. Excellent, very good or good)             | OR 1.90 95% CI 1.55 to 2.33                                | OR 1.65 95% CI 1.31 to 2.08                                | OR 2.41 95% CI 1.97 to 2.94                                |
| <b>Perceived mental health</b><br>Fair or bad (vs. Excellent, very good or good)              | OR 1.04 95% CI 0.79 to 1.37                                | OR 1.08 95% CI 0.79 to 1.47                                | OR 0.94 95% CI 0.73 to 1.21                                |
| <b>Alcohol consumption in the past 12 months</b> (vs. regular)<br>Occasional<br>Has not drunk | OR 1.76 95% CI 1.40 to 2.23<br>OR 1.72 95% CI 1.38 to 2.15 | OR 1.21 95% CI 0.93 to 1.59<br>OR 1.27 95% CI 0.99 to 1.63 | OR 1.57 95% CI 1.24 to 1.99<br>OR 2.28 95% CI 1.85 to 2.80 |

|                                                                    |                             |                             |                             |
|--------------------------------------------------------------------|-----------------------------|-----------------------------|-----------------------------|
| <b>Smoking</b> (vs. regular)                                       |                             |                             |                             |
| Occasional                                                         | OR 0.60 95% CI 0.31 to 1.19 | OR 0.78 95% CI 0.37 to 1.65 | OR 0.77 95% CI 0.42 to 1.40 |
| Never                                                              | OR 0.98 95% CI 0.77 to 1.24 | OR 1.03 95% CI 0.77 to 1.36 | OR 1.18 95% CI 0.93 to 1.49 |
| <b>Physical activity</b> (vs. regular)                             |                             |                             |                             |
| Occasional                                                         | OR 1.09 95% CI 0.79 to 1.51 | OR 1.17 95% CI 0.80 to 1.72 | OR 1.19 95% CI 0.85 to 1.66 |
| Rare                                                               | OR 1.09 95% CI 0.84 to 1.42 | OR 1.49 95% CI 1.10 to 2.02 | OR 1.68 95% CI 1.29 to 2.19 |
| <b>Lifestyle (PACDPAI)</b> (vs. active)                            |                             |                             |                             |
| Moderately active                                                  | OR 0.89 95% CI 0.63 to 1.25 | OR 1.44 95% CI 0.89 to 2.34 | OR 1.01 95% CI 0.69 to 1.46 |
| Inactive                                                           | OR 1.01 95% CI 0.72 to 1.42 | OR 1.77 95% CI 1.09 to 2.87 | OR 1.12 95% CI 0.77 to 1.62 |
| <b>Health care</b>                                                 |                             |                             |                             |
| <b>Visiting a pain clinic in the year before survey completion</b> |                             |                             |                             |
| Yes (vs. No)                                                       | OR 0.97 95% CI 0.53 to 1.76 | OR 0.96 95% CI 0.49 to 1.89 | OR 0.91 95% CI 0.52 to 1.60 |
| <b>Having a family physician</b>                                   |                             |                             |                             |
| Yes (vs. No)                                                       | OR 1.47 95% CI 1.01 to 1.93 | OR 1.28 95% CI 0.84 to 1.93 | OR 1.77 95% CI 1.20 to 2.61 |
| <b>Past-year number of hospitalizations</b>                        | OR 0.93 95% CI 0.80 to 1.07 | OR 0.88 95% CI 0.75 to 1.03 | OR 0.89 95% CI 0.78 to 1.02 |
| <b>Past-year number of visits to a family physician</b>            | OR 1.05 95% CI 1.02 to 1.07 | OR 1.02 95% CI 0.99 to 1.05 | OR 1.04 95% CI 1.01 to 1.06 |
| <b>Past-year number of specialist visits</b>                       | OR 1.02 95% CI 1.00 to 1.03 | OR 1.02 95% CI 1.00 to 1.03 | OR 1.02 95% CI 1.00 to 1.04 |
| <b>Past-year number of emergency room visits</b>                   | OR 0.92 95% CI 0.85 to 0.99 | OR 0.92 95% CI 0.85 to 1.00 | OR 0.94 95% CI 0.88 to 1.00 |
| <b>Past-year number of prescribers consulted</b>                   | OR 1.31 95% CI 1.24 to 1.38 | OR 1.33 95% CI 1.25 to 1.41 | OR 1.40 95% CI 1.33 to 1.48 |
| <b>Past-year number of different physicians consulted</b>          | OR 1.00 95% CI 0.97 to 1.03 | OR 1.03 95% CI 0.10 to 1.06 | OR 1.01 95% CI 0.98 to 1.04 |
